# Supplementary material for: Expected usability is not a valid indicator of experienced usability
Source: PeerJ journal article supplement (doi:10.7717/peerj-cs.19), 2015-09-02
Supplement: appendix1.doc [file appendix1.doc]

**Appendix**

| Website  (content domain) | Task | Mean task duration | Task difficulty |
| --- | --- | --- | --- |
| www.freeware-download.de  (Download & Software) | What is RAM defrag 1.20 used for and how long does it take to download it with a 56K Modem?   - *For an improvement of the RAM, 2h46min* - For the safe erasure of data, 1h23min - For an improvement of the hard-disk performance, 0h, 53min - To cipher data, 1h12min - I have tried but could not find an answer | 92.38 | 0.84 (0.37) |
| [www.danto.de](http://www.danto.de/)  (E-commerce) | How much does it cost to send goods and parcels within Germany?   - *Free of shipping costs* - 3,90 Euro - 5,90 Euro - Only for self-collectors - I have tried but could not find an answer | 65.72 | 0.65 (0.48) |
| [www.myvideo.de](http://www.myvideo.de/)  (Entertainment) | Which information do you need for a registration?   - *User name, e-mail, password, gender and date of birth* - User name and password - E-mail and password - User name, e-mail, password and date of birth - I have tried but could not find an answer | 70.69 | 0.70 (0.46) |
| www.uni-duisburg-essen.de  (E-learning) | What does ABZ mean? What is the name of der/die Beauftragte für Behinderung im Studium?   - *Akademisches Beratungs-Zentrum; Daria Celle Küchenmeister* - Akademisches Bildungs-Zentrum, Horst Meinigner - Arbeits- und Beratungszentrum; Anette Fürhaus - Arbeits- und Bildungszentrum, Jan-Michael Linz - I have tried but could not find an answer | 142.84 | 0.65 (0.48) |
| [www.jobquick.de](http://www.jobquick.de/)  (E-recruiting & E-assessment) | What is the register number of JOBquick?   - *305 113 259* - 306 285 395 - 604 112 354 - 534 873 900 - I have tried but could not find an answer | 66.05 | 0.75 (0.43) |
| [www.dict.leo.org](http://www.dict.leo.org/)  (Information sites) | What is the short cut for „agriculture“?   - *agr.* - agri. - ag. - There is no short cut - I have tried but could not find an answer | 32.32 | 0.91 (0.29) |
| [www.deutschland.de](http://www.deutschland.de/)  (Web portals) | How many households receive ARD in Germany?   - *34 million* - 30 million - 29 million - 23 million - I have tried but could not find an answer | 51.11 | 0.95 (0.23) |
| [www.salzgitter-ag.de](http://www.salzgitter-ag.de/)  (Corporate sites) | What is the date of the analyst conference in Frankfurt/Main?   - *14.8.2012* - 23.7.2012 - 5.9.2012 - 12.7.2012 - I have tried but could not find an answer | 110.51 | 0.67 (0.48) |
| [www.mister-wong.de](http://www.mister-wong.de/)  (Social software & weblogs) | To whom is Walter Hattingers master thesis devoted?   - *To his grandfather* - To his mother - To his father - To his grandmother - I have tried but could not find an answer | 94.22 | 0.81 (0.40) |
| www.bing.com  (Search engines) | What does „usability“ mean in lettish? Please use the bing translator.   - *Ērtu lietošanu* - Zinātne - Vasaras - Aizkaru - I have tried but could not find an answer | 95.77 | 0.67 (0.48) |

Note. Tasks for the interaction with the mean task duration and task difficulty.

Please note: for clarification, we printed the correct answer italicized and at first rank.
