# Supplementary material for: Expected usability is not a valid indicator of experienced usability
Source: PeerJ journal article supplement (doi:10.7717/peerj-cs.19), 2015-09-02
Supplement: appendix2.doc [file appendix2.doc]

**Appendix 2**

| Website | Expected usability (rating given after 50 ms presentation | | Expected usability (rating given after 500 ms presentation | | Expected usability (rating given after 10 s presentation | | Experienced usability (measured via single item) | |
| --- | --- | --- | --- | --- | --- | --- | --- | --- |
|  | *M* | *SD* | *M* | *SD* | *M* | *SD* | *M* | *SD* |
| www.freeware-download.de | 3.56 | 1.02 | 3.26 | 0.94 | 3.16 | 1.00 | 3.30 | 1.33 |
| [www.danto.de](http://www.danto.de/) | 3.47 | 1.09 | 3.42 | 1.15 | 3.75 | 1.20 | 4.32 | 0.89 |
| [www.myvideo.de](http://www.myvideo.de/) | 3.40 | 1.06 | 3.53 | 0.89 | 3.72 | 0.90 | 3.48 | 1.13 |
| www.uni-duisburg-essen.de | 3.84 | 1.10 | 3.95 | 0.99 | 3.88 | 1.00 | 2.98 | 1.33 |
| [www.jobquick.de](http://www.jobquick.de/) | 3.58 | 1.09 | 3.84 | 0.94 | 3.58 | 1.01 | 3.84 | 1.09 |
| www.dict.leo.org | 3.79 | 1.07 | 4.00 | 1.17 | 3.75 | 1.18 | 4.81 | 1.08 |
| [www.deutschland.de](http://www.deutschland.de/) | 4.33 | 0.87 | 4.25 | 0.85 | 4.47 | 0.93 | 4.71 | 1.00 |
| [www.salzgitter-ag.de](http://www.salzgitter-ag.de/) | 4.00 | 0.82 | 3.91 | 0.91 | 3.95 | 0.77 | 3.07 | 1.17 |
| [www.mister-wong.de](http://www.mister-wong.de/) | 3.39 | 0.94 | 3.39 | 1.07 | 3.14 | 0.97 | 3.96 | 1.25 |
| www.bing.com | 4.25 | 1.15 | 4.56 | 1.07 | 4.56 | 1.02 | 3.68 | 1.27 |

Note. Means and standard deviations of expected usability ratings in different time conditions and experienced usability ratings
