# Supplementary material for: Expected usability is not a valid indicator of experienced usability
Source: PeerJ journal article supplement (doi:10.7717/peerj-cs.19), 2015-09-02
Supplement: appendix3.doc [file appendix3.doc]

**Appendix 3**

**Table.** Correlations between expected usability ratings in different conditions with experienced usability and objective usability measures (task completion and duration), as well as with subjective aesthetics ratings

| **Usability rating in condition…** | **1: Expected usability (rating given after 50 ms presentation** | **2: Expected usability (rating given after 500 ms presentation** | **3: Expected usability (rating given after 10 s presentation** | **4: Experienced usability (measured via single item)** | **5: Experienced usability (measured via usability questionnaire** | **6: Task completion** | **7: Task duration1** | **8: Aesthetics rating** |
| --- | --- | --- | --- | --- | --- | --- | --- | --- |
| 1: Expected usability (rating given after 50 ms presentation | - | .89** | .87** | .13 | .16 | .19 | .08 | .75* |
| 2: Expected usability (rating given after 500 ms presentation | .89** | - | .89** | .17 | .19 | .07 | -.11 | .75* |
| 3: Expected usability (rating given after 10 s presentation | .87** | .89** | - | .19 | .25 | -.07 | -.19 | .84** |
| 4: Experienced usability (measured via single item) | .13 | .17 | .19 | - | .98** | .62* | -.86** | .05 |
| 5: Experienced usability (measured via usability questionnaire | .16 | .19 | .25 | .98** | - | .59 | -.94** | .06 |
| 6: Task completion | .19 | .07 | -.07 | .62* | .59 | - | NA | -.18 |
| 7: Task duration1 | .08 | -.11 | -.19 | -.86** | -.94** | NA | - | .11 |
| 8: Aesthetics rating | .75* | .75* | .84** | .05 | .06 | -.18 | .11 | - |

Note. * = p < .05; ** = p < .01

1 Task duration was calculated only with correct answers
